# Supplementary material
Source: ML conference proceedings conference paper supplement (https://proceedings.neurips.cc/paper_files/paper/2015/hash/66368270ffd51418ec58bd793f2d9b1b-Abstract.html)
Supplement: Supplementary file [file 66368270ffd51418ec58bd793f2d9b1b-Supplemental.zip]

Supplement for the paper “Tractable Bayesian  
Network Structure Learning with Bounded  
Vertex Cover Number”

Janne H. Korhonen and Pekka Parviainen

October 23, 2015

| Data           | n  | Unbounded |      | tree-width = 1 |      | tree-width = 2 |        | tree-width = 3 |        | tree-width = 4  |        | tree-width = 5  |        |
|----------------|----|-----------|------|----------------|------|----------------|--------|----------------|--------|-----------------|--------|-----------------|--------|
|                |    | Score     | Time | Score          | Time | Score          | Time   | Score          | Time   | Score           | Time   | Score           | Time   |
| Mildew10000    | 35 | -407644   | 1    | -424311        | 34   | -407821(0.32%) | >14400 | -407644        | 1446   | -407644         | 789    | -407644         | 1723   |
| Mildew1000     | 35 | -47102    | 0    | -47245         | 21   | -47102         | 34     | -47102         | 384    | -47102          | 645    | -47102          | 1104   |
| Mildew100      | 35 | -5720     | 2    | -6000          | 1    | -5935          | 2      | -5786(1.15%)   | >14400 | -5746(0.46%)    | >14400 | -5720           | 2985   |
| Water10000     | 32 | -128706   | 26   | -129804        | 26   | -129103(0.26%) | >14400 | -129016(0.3%)  | >14400 | -128803(0.13%)  | >14400 | -128709(0.06%)  | >14400 |
| Water1000      | 32 | -13262    | 31   | -13307         | 43   | -13276(0.13%)  | >14400 | -13264(0.04%)  | >14400 | -13262          | 3102   | -13262          | 4365   |
| Water100       | 32 | -1501     | 28   | -1508          | 17   | -1502(0.03%)   | >14400 | -1501(0.06%)   | >14400 | -1501           | 5578   | -1501           | 7870   |
| alarm10000     | 37 | -105227   | 786  | -118383        | 67   | -110217(5.53%) | >14400 | -106349(2.59%) | >14400 | -106797(3.07%)  | >14400 | -106975(3.34%)  | >14400 |
| alarm1000      | 37 | -11240    | 7    | -12315         | 69   | -11774(4.93%)  | >14400 | -11469(2.48%)  | >14400 | -11291(0.95%)   | >14400 | -11273(0.94%)   | >14400 |
| alarm100       | 37 | -1349     | 2    | -1473          | 70   | -1443(5.57%)   | >14400 | -1455(7.84%)   | >14400 | -1412(4.79%)    | >14400 | -1401(4.24%)    | >14400 |
| asia10000      | 8  | -22466    | 1    | -23037         | 1    | -22469(0.14%)  | >14400 | -22466         | 541    | -22466          | 510    | -22466          | 31     |
| asia1000       | 8  | -2317     | 0    | -2372          | 0    | -2329(0.55%)   | >14400 | -2317          | 159    | -2317           | 111    | -2317           | 6      |
| asia100        | 8  | -246      | 0    | -246           | 0    | -246           | 2      | -246           | 21     | -246            | 42     | -246            | 2      |
| carpo10000     | 60 | -174131   | 6739 | -181686        | 839  | -177127(0.89%) | >14400 | -175324(8.63%) | >14400 | -175312(10.84%) | >14400 | -175324(11.37%) | >14400 |
| carpo1000      | 60 | -17719    | 106  | -18413         | 1142 | -18192(2.29%)  | >14400 | -18436(10.82%) | >14400 | -18271(10.42%)  | >14400 | -19112(17.27%)  | >14400 |
| carpo100       | 60 | -1829     | 900  | -1974          | 465  | -2050(10.71%)  | >14400 | -2065(13.95%)  | >14400 | -2101(21.17%)   | >14400 | -2131(23.02%)   | >14400 |
| haifinder10000 | 56 | -497632   | 86   | -512293        | 557  | -500054(0.7%)  | >14400 | -499777(9.44%) | >14400 | -500313(11.75%) | >14400 | -500313(16.56%) | >14400 |
| haifinder1000  | 56 | -52473    | 16   | -53401         | 617  | -52478(0.19%)  | >14400 | -52593(7.37%)  | >14400 | -52616(10.98%)  | >14400 | -52605(12.36%)  | >14400 |
| haifinder100   | 56 | -6019     | 0    | -6076          | 41   | -6021          | 182    | -6019          | 7926   | -6034(5.87%)    | >14400 | -6041(7.25%)    | >14400 |
| insurance10000 | 27 | -132969   | 23   | -144844        | 24   | -142329(6.77%) | >14400 | -138442(4.35%) | >14400 | -133866(1.07%)  | >14400 | -133108(0.51%)  | >14400 |
| insurance1000  | 27 | -13887    | 1    | -14702         | 15   | -14261(2.63%)  | >14400 | -14170(2.04%)  | >14400 | -13887          | 785    | -13887          | 1314   |
| insurance100   | 27 | -1686     | 0    | -1728          | 10   | -1711(1.42%)   | >14400 | -1692(0.35%)   | >14400 | -1686           | 341    | -1686           | 492    |
| kreditfamily   | 18 | -16696    | 0    | -16698         | 0    | -16696         | 1      | -16696         | 32     | -16696          | 33     | -16696          | 26     |
| Abalone        | 9  | -15401    | 1    | -16278         | 0    | -15462         | 36     | -15417(0.1%)   | >14400 | -15401          | 420    | -15401          | 457    |
| adult15N       | 15 | -351151   | 2    | -356324        | 2    | -354806(0.81%) | >14400 | -354656(0.94%) | >14400 | -351712(0.16%)  | >14400 | -351151         | 283    |
| Flag           | 29 | -2748     | 7    | -2803          | 13   | -2748          | 374    | -2796(1.7%)    | >14400 | -2780(1.15%)    | >14400 | -2756(0.29%)    | >14400 |
| Heart          | 23 | -2397     | 1    | -2445          | 8    | -2397          | 86     | -2401(0.16%)   | >14400 | -2397           | 239    | -2397           | 413    |
| Hepatitis      | 20 | -1323     | 1    | -1338          | 12   | -1323          | 45     | -1330(0.6%)    | >14400 | -1323           | 232    | -1323           | 184    |
| Horse          | 28 | -4525     | 3    | -4579          | 11   | -4561(0.81%)   | >14400 | -4525          | 781    | -4525           | 844    | -4525           | 1153   |
| Housing        | 14 | -3080     | 33   | -3479          | 2    | -3424(5.01%)   | >14400 | -3251(3.29%)   | >14400 | -3247(5.34%)    | >14400 | -3150(3.44%)    | >14400 |
| Voting         | 17 | -4643     | 1    | -4658          | 5    | -4643          | 30     | -4643          | 174    | -4643           | 193    | -4643           | 163    |
| Wine           | 14 | -1271     | 2    | -1285          | 2    | -1271          | 34     | -1271          | 134    | -1271           | 249    | -1271           | 127    |
| Zoo            | 17 | -848      | 0    | -858           | 2    | -848           | 15     | -848           | 70     | -848            | 118    | -848            | 101    |

Table 1: Results for unbounded tree-width and tree-widths 1–5. For each case, the score of an optimal DAG and the running time is reported; if the computations were not finished at the time limit, we report the score of the best DAG found and the gap (the gap is a ratio  $|s_1 - s_2|/|s_1|$ , where  $s_1$  is the score of the best feasible solution and  $s_2$  is the smallest known upper bound for the score of an optimal network). Scores and running times are rounded to the nearest integer.

| Data            | n  | Unbounded |      | VC number = 1 |      | VC number = 2 |      | VC number = 3 |      | VC number = 4 |      | VC number = 5 |      |
|-----------------|----|-----------|------|---------------|------|---------------|------|---------------|------|---------------|------|---------------|------|
|                 |    | Score     | Time | Score         | Time | Score         | Time | Score         | Time | Score         | Time | Score         | Time |
| Mildew10000     | 35 | -407644   | 1    | -509428       | 0    | -473918       | 3    | -454469       | 3    | -446114       | 13   | -439382       | 11   |
| Mildew1000      | 35 | -47102    | 0    | -54412        | 0    | -51411        | 1    | -49772        | 1    | -49202        | 10   | -48759        | 4    |
| Mildew100       | 35 | -5720     | 2    | -6309         | 0    | -6151         | 0    | -5983         | 74   | -5892         | 57   | -5833         | 70   |
| Water10000      | 32 | -128706   | 26   | -160387       | 0    | -154095       | 1    | -148486       | 7    | -142990       | 45   | -138879       | 53   |
| Water1000       | 32 | -13262    | 31   | -16339        | 0    | -15754        | 1    | -15186        | 1    | -14643        | 1    | -14215        | 1    |
| Water100        | 32 | -1501     | 28   | -1791         | 0    | -1732         | 0    | -1682         | 2    | -1633         | 1    | -1588         | 1    |
| alarm10000      | 37 | -105227   | 786  | -172927       | 1    | -154994       | 5    | -137775       | 38   | -130289       | 86   | -124761       | 625  |
| alarm1000       | 37 | -11240    | 7    | -17884        | 1    | -16072        | 2    | -14402        | 6    | -13744        | 22   | -13264        | 86   |
| alarm100        | 37 | -1349     | 2    | -2037         | 0    | -1883         | 2    | -1747         | 2    | -1648         | 6    | -1578         | 10   |
| asia10000       | 8  | -22466    | 1    | -25794        | 0    | -22820        | 2    | -22469        | 10   | -22466        | 21   | -22466        | 20   |
| asia1000        | 8  | -2317     | 0    | -2621         | 0    | -2357         | 0    | -2320         | 3    | -2317         | 6    | -2317         | 8    |
| asia100         | 8  | -246      | 0    | -271          | 0    | -247          | 0    | -246          | 1    | -246          | 1    | -246          | 1    |
| carpo10000      | 60 | -174131   | 6739 | -220979       | 2    | -201424       | 16   | -191893       | 141  | -186470       | 481  | -182037       | 843  |
| carpo1000       | 60 | -17719    | 106  | -22109        | 1    | -20244        | 8    | -19397        | 19   | -18913        | 24   | -18546        | 34   |
| carpo100        | 60 | -1829     | 900  | -2420         | 4    | -2213         | 7    | -2104         | 34   | -2055         | 151  | -2005         | 310  |
| hailfinder10000 | 56 | -497632   | 86   | -604656       | 4    | -586718       | 14   | -571259       | 41   | -558578       | 73   | -547059       | 141  |
| hailfinder1000  | 56 | -52473    | 16   | -62208        | 1    | -60701        | 5    | -59224        | 7    | -57975        | 9    | -56897        | 14   |
| hailfinder100   | 56 | -6019     | 0    | -6788         | 0    | -6664         | 1    | -6543         | 2    | -6437         | 2    | -6339         | 1    |
| insurance10000  | 27 | -132969   | 23   | -190711       | 0    | -172051       | 3    | -162410       | 27   | -154919       | 104  | -147054       | 29   |
| insurance1000   | 27 | -13887    | 1    | -19193        | 0    | -17671        | 1    | -16830        | 12   | -15997        | 7    | -15239        | 9    |
| insurance100    | 27 | -1686     | 0    | -2102         | 0    | -1988         | 5    | -1913         | 3    | -1843         | 10   | -1793         | 5    |
| kreditfamily    | 18 | -16696    | 0    | -17213        | 0    | -16978        | 0    | -16821        | 0    | -16762        | 0    | -16725        | 1    |
| Abalone         | 9  | -15401    | 1    | -16408        | 0    | -15775        | 13   | -15571        | 34   | -15474        | 49   | -15401        | 44   |
| adult15N        | 15 | -351151   | 2    | -396233       | 0    | -369029       | 4    | -357371       | 15   | -355010       | 79   | -353333       | 154  |
| Flag            | 29 | -2748     | 7    | -3007         | 0    | -2933         | 1    | -2880         | 6    | -2844         | 72   | -2820         | 288  |
| Heart           | 23 | -2397     | 1    | -2867         | 0    | -2746         | 1    | -2631         | 4    | -2531         | 4    | -2476         | 8    |
| Hepatitis       | 20 | -1323     | 1    | -1414         | 0    | -1374         | 9    | -1352         | 16   | -1339         | 18   | -1331         | 21   |
| Horse           | 28 | -4525     | 3    | -4872         | 0    | -4763         | 0    | -4674         | 6    | -4628         | 22   | -4589         | 7    |
| Housing         | 14 | -3080     | 33   | -3715         | 0    | -3494         | 10   | -3400         | 433  | -3292         | 680  | -3198         | 819  |
| Voting          | 17 | -4643     | 1    | -4885         | 0    | -4703         | 13   | -4670         | 16   | -4658         | 21   | -4653         | 30   |
| Wine            | 14 | -1271     | 2    | -1313         | 0    | -1289         | 23   | -1276         | 35   | -1272         | 27   | -1271         | 25   |
| Zoo             | 17 | -848      | 0    | -971          | 0    | -927          | 9    | -890          | 6    | -863          | 5    | -850          | 4    |

Table 2: Results for unbounded vertex cover number and vertex cover numbers 1–5. For each case, the score of an optimal DAG and the running time is reported; if the computations were not finished at the time limit, we report the score of the best DAG found and the gap (the gap is a ratio  $|s_1 - s_2|/|s_1|$ , where  $s_1$  is the score of the best feasible solution and  $s_2$  is the smallest known upper bound for the score of an optimal network). Scores and running times are rounded to the nearest integer.

|                 |    | VC number = 6 |      | VC number = 7 |      | VC number = 8 |      | VC number = 9 |        | VC number = 10 |        |
|-----------------|----|---------------|------|---------------|------|---------------|------|---------------|--------|----------------|--------|
| Data            | n  | Score         | Time | Score         | Time | Score         | Time | Score         | Time   | Score          | Time   |
| Mildew10000     | 35 | -434370       | 15   | -429812       | 15   | -425404       | 20   | -421147       | 25     | -416998        | 15     |
| Mildew1000      | 35 | -48349        | 4    | -47945        | 4    | -47580        | 3    | -47449        | 13     | -47321         | 13     |
| Mildew100       | 35 | -5804         | 192  | -5779         | 367  | -5755         | 162  | -5742         | 220    | -5735          | 146    |
| Water10000      | 32 | -135480       | 64   | -132971       | 44   | -131218       | 42   | -130068       | 90     | -129113        | 76     |
| Water1000       | 32 | -13896        | 4    | -13689        | 8    | -13508        | 9    | -13391        | 17     | -13303         | 50     |
| Water100        | 32 | -1548         | 2    | -1535         | 18   | -1523         | 14   | -1516         | 15     | -1509          | 12     |
| alarm10000      | 37 | -119562       | 417  | -115699       | 872  | -113166       | 2012 | -111372       | 13304  | -109791        | 13620  |
| alarm1000       | 37 | -12757        | 37   | -12449        | 180  | -12168        | 106  | -11983        | 123    | -11792         | 159    |
| alarm100        | 37 | -1535         | 33   | -1510         | 104  | -1476         | 37   | -1449         | 42     | -1422          | 83     |
| asia10000       | 8  | -22466        | 34   | -22466        | 44   | -22466        | 41   | -22466        | 42     | -22466         | 47     |
| asia1000        | 8  | -2317         | 5    | -2317         | 6    | -2317         | 6    | -2317         | 6      | -2317          | 6      |
| asia100         | 8  | -246          | 1    | -246          | 1    | -246          | 1    | -246          | 1      | -246           | 1      |
| carpo10000      | 60 | -178440       | 1624 | -175924       | 1925 | -174860       | 2271 | -174658       | 10174  | -174476        | 9054   |
| carpo1000       | 60 | -18167        | 28   | -17933        | 82   | -17804        | 94   | -17780        | 348    | -17756         | 428    |
| carpo100        | 60 | -1969         | 785  | -1933         | 796  | -1913         | 3612 | -1907(0.6%)   | >14400 | -1899(0.74%)   | >14400 |
| hailfinder10000 | 56 | -539233       | 632  | -531427       | 226  | -524603       | 232  | -519114       | 340    | -514429        | 290    |
| hailfinder1000  | 56 | -56117        | 23   | -55355        | 20   | -54770        | 42   | -54191        | 33     | -53749         | 47     |
| hailfinder100   | 56 | -6278         | 5    | -6218         | 4    | -6160         | 4    | -6125         | 4      | -6096          | 6      |
| insurance10000  | 27 | -142526       | 118  | -139026       | 152  | -136489       | 181  | -135456       | 244    | -134443        | 493    |
| insurance1000   | 27 | -14745        | 16   | -14398        | 19   | -14183        | 21   | -14074        | 35     | -14001         | 55     |
| insurance100    | 27 | -1763         | 8    | -1742         | 12   | -1720         | 9    | -1708         | 11     | -1701          | 19     |
| kreditfamily    | 18 | -16699        | 1    | -16696        | 0    | -16696        | 0    | -16696        | 0      | -16696         | 0      |
| Abalone         | 9  | -15401        | 57   | -15401        | 45   | -15401        | 39   | -15401        | 40     | -15401         | 40     |
| adult15N        | 15 | -351891       | 52   | -351470       | 51   | -351243       | 52   | -351151       | 48     | -351151        | 47     |
| Flag            | 29 | -2802         | 270  | -2783         | 296  | -2773         | 365  | -2767         | 344    | -2761          | 247    |
| Heart           | 23 | -2452         | 17   | -2428         | 14   | -2418         | 26   | -2409         | 27     | -2403          | 24     |
| Hepatitis       | 20 | -1327         | 44   | -1323         | 17   | -1323         | 24   | -1323         | 27     | -1323          | 22     |
| Horse           | 28 | -4568         | 14   | -4557         | 50   | -4546         | 31   | -4539         | 52     | -4530          | 35     |
| Housing         | 14 | -3135         | 788  | -3111         | 3130 | -3088         | 5622 | -3080         | 2690   | -3080          | 1393   |
| Voting          | 17 | -4647         | 36   | -4643         | 30   | -4643         | 21   | -4643         | 33     | -4643          | 22     |
| Wine            | 14 | -1271         | 23   | -1271         | 26   | -1271         | 21   | -1271         | 29     | -1271          | 19     |
| Zoo             | 17 | -849          | 9    | -848          | 8    | -848          | 9    | -848          | 12     | -848           | 6      |

Table 3: Results for vertex cover numbers 6–10. For each case, the score of an optimal DAG and the running time is reported; if the computations were not finished at the time limit, we report the score of the best DAG found and the gap (the gap is a ratio  $|s_1 - s_2|/|s_1|$ , where  $s_1$  is the score of the best feasible solution and  $s_2$  is the smallest known upper bound for the score of an optimal network). Scores and running times are rounded to the nearest integer.
